# Supplementary material
Source: Research Square preprint supplement (doi:10.21203/rs.3.rs-9792905/v1)
Supplement: Supplementary file 1 [file 8d7aa2c558c34c4cb64640bf.docx]

**Supplementary Table 1.**

**Sociodemographic characteristics of donors (N = 95).**

| **Age (years)** | | |  | **Labour status (multiple choice)** | | |
| --- | --- | --- | --- | --- | --- | --- |
|  | ***N*** | **%** |  |  | ***N*** | **%** |
| 18–23 | 2 | 2% |  | Paid work | 87 | 92% |
| 24–29 | 25 | 26% |  | Unemployed | 4 | 4% |
| 30–35 | 49 | 52% |  | Student | 4 | 4% |
| 36–41 | 15 | 16% |  | Military / compulsory service | 1 | 1% |
| ≥42 | 3 | 3% |  | Fulfilling domestic tasks | — | — |
| Missing | 1 | 1% |  |  |  |  |
| Total | 95 | 100% |  |  |  |  |
|  |  |  |  | *Note: Total responses exceed 95 because participants could select more than one option. Please complete the missing N for 'Fulfilling domestic tasks' from the raw data before submission.* | | |
|  |  |  |  |  |  |  |
| **Education level** | | |  | **Employment type** | | |
|  | ***N*** | **%** |  |  | ***N*** | **%** |
| Tertiary – doctorate or higher | 8 | 8% |  | Full-time | 61 | 64% |
| Tertiary – master's | 49 | 52% |  | Part-time | 13 | 14% |
| Tertiary – bachelor's or unspecified | 7 | 7% |  | Self-employed | 11 | 12% |
| Post-secondary, non-tertiary | 22 | 23% |  | Other employment | 2 | 2% |
| Upper secondary | 8 | 8% |  | Not employed | 7 | 7% |
| Lower secondary | 1 | 1% |  | Missing | 1 | 1% |
| Total | 95 | 100% |  | Total | 95 | 100% |
|  |  |  |  |  |  |  |
| **Maternal leave** | | |  | **Place of living** | | |
|  | ***N*** | **%** |  |  | ***N*** | **%** |
| Yes – paid | 83 | 87% |  | Rural | 15 | 16% |
| Yes – unpaid | 1 | 1% |  | Urban | 74 | 78% |
| No | 10 | 11% |  | Missing | 6 | 6% |
| Missing | 1 | 1% |  | Total | 95 | 100% |
| Total | 95 | 100% |  |  |  |  |
|  |  |  |  |  |  |  |
| **Household income (self-reported category)** | | |  | **Nationality** | | |
|  | ***N*** | **%** |  |  | ***N*** | **%** |
| High | 17 | 18% |  | Polish, Dutch or Italian | 80 | 84% |
| Medium | 37 | 39% |  | Double, including one of the above | 3 | 3% |
| Low | 4 | 4% |  | European (other) | 2 | 2% |
| Missing | 37 | 39% |  | Other | 2 | 2% |
| Total | 95 | 100% |  | Missing | 8 | 8% |
|  |  |  |  | Total | 95 | 100% |
|  |  |  |  |  |  |  |
| **Household income (vs national equivalised median)** | | |  | **Religion** | | |
|  | ***N*** | **%** |  |  | ***N*** | **%** |
| Above national median | 34 | 36% |  | Christian | 17 | 18% |
| Below national median | 24 | 25% |  | Christian – Catholic | 43 | 45% |
| Missing | 37 | 39% |  | Atheist | 19 | 20% |
| Total | 95 | 100% |  | Missing / other | 16 | 17% |
|  |  |  |  | Total | 95 | 100% |
|  |  |  |  |  |  |  |
| **Marital status** | | |  |  | | |
|  | ***N*** | **%** |  |  | ***N*** | **%** |
| Married | 73 | 77% |  |  |  |  |
| Living with partner | 20 | 21% |  |  |  |  |
| Divorced | 1 | 1% |  |  |  |  |
| Missing / other | 1 | 1% |  |  |  |  |
| Total | 95 | 100% |  |  |  |  |
|  |  |  |  |  |  |  |

*Notes.* Percentages are calculated against N = 95 donors and rounded to the nearest whole number; column totals may not sum exactly to 100% due to rounding. Country-specific breakdowns are available from the corresponding author on request.
