# Supplementary material
Source: Research Square preprint supplement (doi:10.21203/rs.3.rs-9792905/v1)
Supplement: Supplementary file 2 [file a09d12ad34b5dfa01f5f2efa.docx]

**Table 2. Mann–Whitney U tests comparing maternal age between donors who did and did not report each motivation**

| **Motivation** | **Reporting** | | **Not reporting** | | **Mann–Whitney U test** | | |
| --- | --- | --- | --- | --- | --- | --- | --- |
|  | ***n*** | **Mean age (SD)** | ***n*** | **Mean age (SD)** | ***W*** | ***p*** | ***r*** |
| ***Cultural milk diamond category*** | | | | | | | |
| Producer (donor)-focused | 28 | 32.0 (4.25) | 66 | 31.9 (4.47) | 937.5 | .914 | +0.02 |
| Consumer (receiver)-focused | 41 | 32.6 (4.71) | 53 | 31.4 (4.08) | 954.5 | .314 | −0.12 |
| Object (milk)-focused | 66 | 32.4 (4.38) | 28 | 30.9 (4.29) | 755.0 | .162 | −0.18 |
| Social world (community)-focused | 22 | 30.5 (4.23) | 72 | 32.4 (4.37) | 974.0 | .104 | +0.23 |
| ***Individual code*** | | | | | | | |
| Milk surplus | 48 | 31.3 (3.67) | 32 | 33.9 (5.19) | 982.5 | .035* | +0.28 |
| Willingness to help | 40 | 32.6 (4.76) | 40 | 32.1 (4.26) | 772.5 | .794 | −0.03 |
| *p < .05. Tests were conducted on n = 94 donors (one participant had missing age data). W is the Wilcoxon W statistic reported by JASP for the Mann–Whitney U test (equivalent to U computed with the “not reporting” group as reference). The effect-size estimate r is the rank-biserial correlation; a positive r indicates that donors reporting the motivation skewed younger than those not reporting it, and a negative r indicates the reverse. SD = standard deviation. | | | | | | | |
