# Supplementary material
Source: Research Square preprint supplement (doi:10.21203/rs.3.rs-9792905/v1)
Supplement: Supplementary file 3 [file acb01cfb471dd1d9bf34cfd7.docx]

**Table 1. List of codes and their classification within the cultural milk diamond**

| **Code** | **Quote** | **Frequency**  **N (%*)** |
| --- | --- | --- |
| **Object (milk) focused reasons for donation** | | **67 (83%)** |
| **Surplus milk**  Having too much milk | *“I became a human milk donor because I have a lot of milk and my child doesn’t need as much so far”* | 49 (60%) |
| **Beliefs of human milk**  Personal beliefs regarding human milk as well as colloquial knowledge | *“(…) Mothers’ milk is precious”* | 15 (19%) |
| **Knowledge and education**  Professional, evidence-based knowledge or information on health benefits of human milk | *“Because I learnt about the benefits of replacing artificial milk with mother’s milk in the intensive care unit.”* | 9 (11%) |
| **Incentives**  Possibility to get milk tests or screening | *“I wanted to learn my milk composition and if I have antibodies”* | 2 (2%) |
| **Social world (community) focused reasons for donation** | | **23 (28%)** |
| **Avoiding waste**  General attitude of avoiding waste, especially avoiding milk waste | *“(…) I don’t like wasting (…)”* | 12 (15%) |
| **Advertising or advice**  Donation because of advertising or receiving some advice to donate | *“A midwife, who helped me out after my labour, told me about this option (…)”* | 5 (6%) |
| **Reciprocity**  A desire to give back either by benefiting from HMB before or knowing someone who did | *“(…) my son benefited from this in the NICU the first few feedings. I am happy to return the favor”* | 6 (7%) |
| **Producer (donor) focused reasons for donation** | | **28 (35%)** |
| **Pragmatism or organizational convenience**  Donation as a pragmatic or convenient act, due to e.g. expressing milk or hospitalization | *“(…) I have to pump a lot of milk because of fast milk flow”* | 18 (22%) |
| **Personal/biographical experiences**  Personal (e.g. NICU hospitalization) or biographical (e.g. being a blood donor, being a medical professional) experience as a motive for donation | *“(…) My mom breastfed someone else’s baby on the maternity ward after having me.”* | 15 (19%) |
| **Consumer (receiver) focused reasons for donation** | | **41 (51%)** |
| **Willingness to help others**  Expressing care about others and a desire to help others in need, especially mothers and babies | *“Because I wanted to help women who do not have milk for their babies.”* | 40 (49%) |
| **Emergency donation**  Referencing to certain emergency situations as a motive to donate (e.g. COVID-19 separation policies) | *“I would like to support babies and their mothers, who due to the need for separation after birth, are not able to be fed with their mother’s milk.”* | 2 (2%) |
| *Percentages are calculated against the 81 respondents who answered the open-ended motivation question. Category subtotals (N for each of the four cultural milk diamond categories) reflect the number of respondents whose answer included at least one code from that category; individual code counts within a category can therefore sum to more than the category subtotal because a respondent could give more than one reason within the same category. Multiple answers were possible and percentages are rounded, so totals may exceed 100%. We use the term ‘mothers’ as a gender-neutral notion, to cover gender-diverse people and to highlight the importance of maternal solidarity grounded in birthing and lactating experience. Non-lactating parents and guardians who cannot (or do not want to) breastfeed can also be considered recipients of donor human milk. We have not altered the language used by respondents. | | |
